# Supplementary material for: Computational insights into the structural and electronic properties of first-row transition metal-doped In 2 O 3 systems
Source: Royal Society of Chemistry journal article supplement (doi:10.1039/d5cp04556h), 2026-01-01
Supplement: d5cp04556h2.pdf [file d5cp04556h2.pdf]

## **Computational Insights into the Structural and Electronic Properties of First-Row Transition Metal-Doped In<sub>2</sub>O<sub>3</sub> Systems**

Ling Meng,<sup>ab</sup> Francesc Viñes<sup>a</sup> and Francesc Illas<sup>\*a</sup>

<sup>a</sup> *Departament de Ciència de Materials i Química Física & Institut de Química Teòrica i Computacional (IQTUB), Universitat de Barcelona, c/ Martí i Franquès 1-11, 08028, Barcelona, Spain.*

<sup>b</sup> *State Key Laboratory of Chemical Resource Engineering, Beijing Engineering Center for Hierarchical Catalysts, College of Chemistry, Beijing University of Chemical Technology, Beijing 100029, China.*

\* Corresponding authors: [francesc.illas@ub.edu](mailto:francesc.illas@ub.edu)

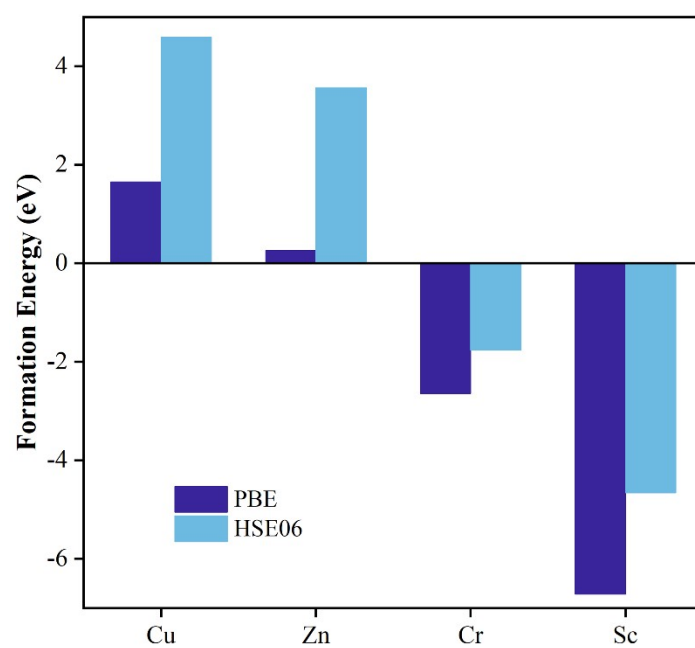

**Figure S1.** Comparison of formation energy calculated with PBE and HSE06 functionals.

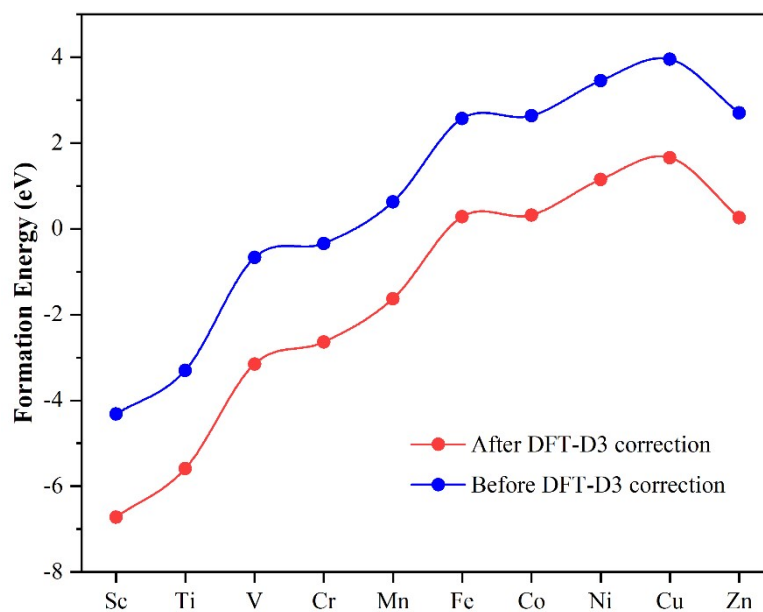

**Figure S2.** Comparison of formation energies for 3d TM-doped  $\text{In}_2\text{O}_3$  calculated without (top points) and with (bottom points) DFT-D3 dispersion correction.

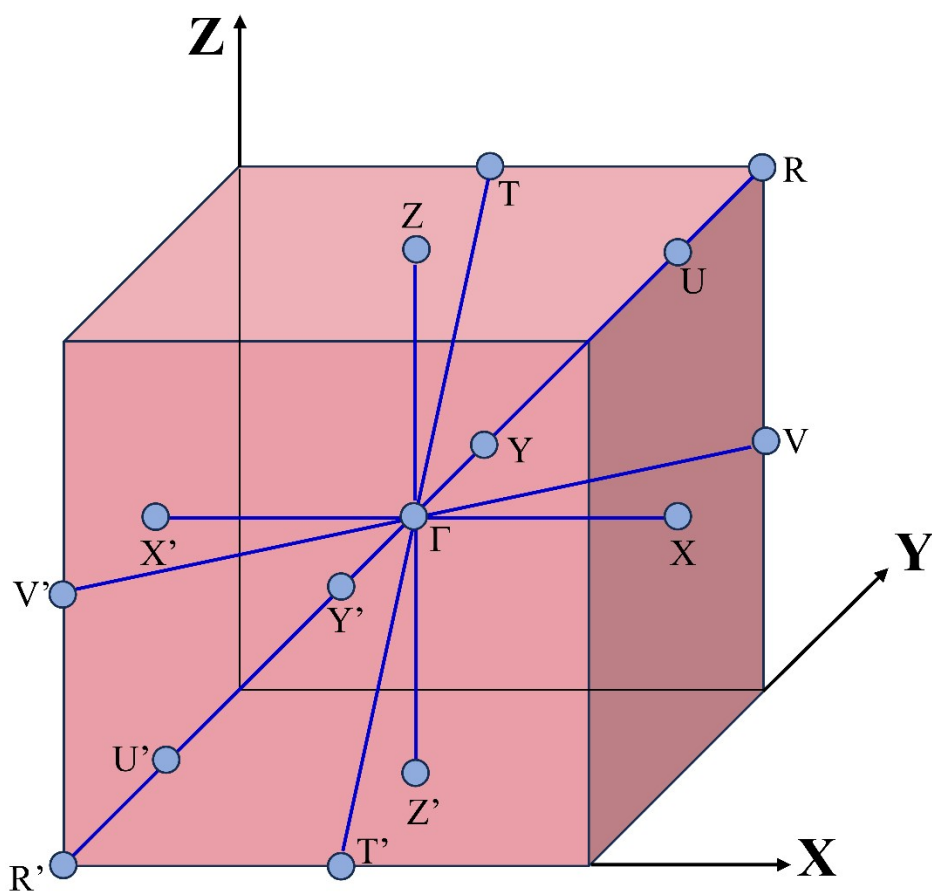

**Figure S3.** High-symmetry  $k$ -paths in the reciprocal space of Sc-doped  $\text{In}_2\text{O}_3$ .

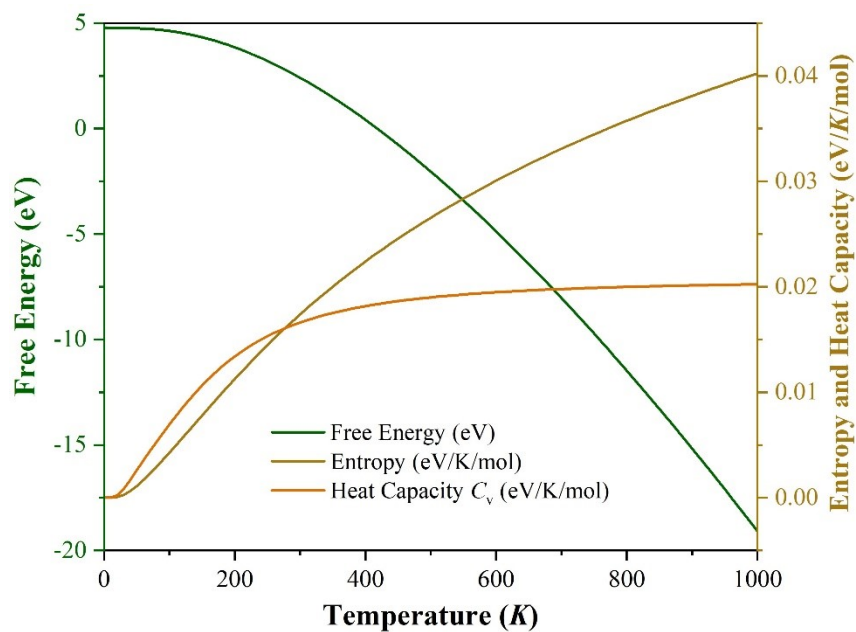

**Figure S4.** Thermodynamic properties of Sc-doped  $\text{In}_2\text{O}_3$  as a function of temperature. The green curve is the Helmholtz free energy (left Y-axis), the brown curve is the entropy (right Y-axis), and the orange curve is the heat capacity  $C_v$  (right Y-axis).
